# Supplementary material for: Contextualising health screening risk assessments in police custody suites – qualitative evaluation from the HELP-PC study in London, UK
Source: BMC Public Health. 2018 Mar 22;18:393. doi: 10.1186/s12889-018-5271-6 (PMC5863839; doi:10.1186/s12889-018-5271-6)
Supplement: Supplementary file 1 — Framework of codes from detainee comments. (DOCX 14 kb) [file 12889_2018_5271_MOESM1_ESM.docx]

*Framework of codes from the detainee comments.*

| Higher-level themes | Emergent themes | Codes |
| --- | --- | --- |
| 1. Suggestions for improvement | Questions need to be improved | Difficult to understand some questions |
| Long winded process |
| Language issues |
| Need more on mental health |
| Needs to be more in depth |
| Should ask about communicable disease |
| Not thorough enough |
| Open ended questions of no use |
| Need to ask about health earlier | Need to ask about health before or at time of arrest |
| 2. Negativity regarding the police | Police not sufficiently engaged in the process | Felt that sgt judged him |
| Lack of concern by officers |
| Sgt not concerned enough |
| Sgts going through motions |
| Negative re attitudes of officers |
| Negative re sgts |
| Don’t trust the police to tell them health issues | Don't trust the police with health information |
| Everyone should see a HCP |
| Need more privacy and confidentiality |
| Cautious approach of Sgt | Sgts overly cautious |
| 3. Generally positive responses | Positive responses about the questions | Positive about screening questions |
| Positive responses about the sgt | Sgt did a good job |
| 4. Detainee factors influencing the answers to questions | Detainee may influence the outcome | Answers can be influenced by the person being asked them |
| Could make things up |
| Not in a fit state to answer properly so soon after arrest |
